# Supplementary material for: CCN1 induces hepatic ductular reaction through integrin αvβ5–mediated activation of NF-κB
Source: JCI journal article supplement (doi:10.1172/jci79327), 2015-03-29
Supplement: sd1 [file 1]

## **Supplementary Materials and Methods**

**Hepatocyte toxicity assay.** Freshly isolated hepatocytes were incubated for overnight with varying concentrations (0-125  $\mu$ M) of sodium glycochenodeoxycholate (GCDG) or sodium glycocholate hydrate (GCA). Cell numbers were counted.

**Bile acid assay.** Bile acids were measured using Mouse Total Bile Acids Assay Kit (Crystal Chem) following the manufacturer's instructions.

**In vivo localization of FITC-labeled proteins.** CCN1 or JAG1 were fluorescein isothiocyanate (FITC)-labeled using a ProtOn Fluorescein labeling kit according to the manufacturer's instructions (Vector Laboratories). Proteins (CCN1, 1 mg/kg; Jag1, 1 mg/kg) were injected via retro-orbital and intraperitoneal delivery, and liver tissues were collected after 2 or 24 hours. Fluorescent signals were obtained using liver cryosections (7  $\mu$ m).

**Immunocytochemistry.** For p16 staining, cholangiocytes were stained with anti-p16 antibody (Santa Cruz Biotech) and visualized with anti-rabbit IgG Alexa Fluor 488 (Invitrogen). TUNEL assay was performed using the ApopTaq Red detection kit (Millipore) following manufacturer's protocol.

## SUPPLEMENTAL FIGURE LEGENDS

**Supplemental Figure S1. Bile acid accumulation and hepatocyte sensitivity to bile acid in *Ccn1*<sup>wt/wt</sup> and *Ccn1*<sup>D125A/D125A</sup> mice.** (A) Primary hepatocytes were isolated from *Ccn1*<sup>wt/wt</sup> and *Ccn1*<sup>D125A/D125A</sup> mice and incubated with indicated concentration of GCDCA or GCA overnight, and cell numbers were counted. Average values from triplicate determination are expressed as mean  $\pm$  s.d. (B) Liver bile acids and serum bile acids from *Ccn1*<sup>wt/wt</sup> and *Ccn1*<sup>D125A/D125A</sup> mice 7 days after BDL or sham operation were measured. Data expressed are mean  $\pm$  s.d. n=6 per group. Bile acid production and hepatocyte sensitivity to bile acid in *Ccn1*<sup>wt/wt</sup> and *Ccn1*<sup>D125A/D125A</sup> mice were similar.

**Supplemental Figure S2. Hepatocytes proliferation from *Ccn1*<sup>wt/wt</sup> and *Ccn1*<sup>D125A/D125A</sup> mice after BDL or DDC-diet were not different.** Liver sections from *Ccn1*<sup>wt/wt</sup> and *Ccn1*<sup>D125A/D125A</sup> 7 days after BDL (upper panel) or DDC-diet for 6 weeks (lower panel) were immunostained for PCNA, and percentage of PCNA-positive hepatocytes were quantified and expressed as mean  $\pm$  s.d. (n=6 per group). Bar=50  $\mu$ m.

**Supplemental Figure S3. Localization of FITC-labeled CCN1 or Jag1 in the liver.** (A) FITC-labeled CCN1 protein or soluble Jag1 (1 mg/kg each) were delivered into WT mice via retro-orbital injection (A) or intraperitoneal injection (B), and liver tissues were collected after 2 or 24 hours. Fluorescent signals (494 nm excitation/518 nm emission) were obtained in liver cryosections (7  $\mu$ m). Bar=100  $\mu$ m.

**Supplemental Figure S4. Knockdown of *Ccn1* did not induce cholangiocyte apoptosis or senescence.** LMCCs were incubated with *siCcn1* or non-targeting siRNA control for 2 days,

and analyzed for TUNEL staining (left panel) and stained with antibody recognizing p16 (right panel). Bar = 50  $\mu$ m.

**Supplemental Figure S5. Adenoviral overexpression of *Ccn1* enhanced cholangiocyte cell proliferation.** LMCCs were transduced with adenovirus overexpressing *Ccn1* or *LacZ* as control. (A) Pictures showing cells 2 days after viral transduction. (B) Cells were incubated with BrdU for 25 min. and percentage of BrdU positive cells were counted. Data are expressed as mean  $\pm$  s.d. of triplicate determinations. \* $p < 0.001$ , Student *t* test.

**Supplemental Figure S6. Efficiency of siRNA knockdown.** LMCCs were treated siRNA targeting indicated integrin subunits and non-targeting siRNA as control for 2 days. Total RNA was isolated and mRNA expression of genes indicated was evaluated by qRT-PCR. Data are expressed as mean  $\pm$  s.d. of triplicate determinations. \* $p < 0.0001$ , Student *t* test.

**Supplemental Figure S7. Expression of proliferation-related NF $\kappa$ B target genes.** LMCCs were treated with *siCcn1*, *siJag1* or non-targeting siRNA as control for 2 day, or treated overnight with purified recombinant CCN1 or BSA as control (4  $\mu$ g/ml each), BAY11-7082 (5  $\mu$ M), control peptide (25  $\mu$ M) or NBD (25  $\mu$ M). Expression of cyclin D1, IL-6, and  $\beta$ -actin was measured by qRT-PCR of mRNA. Data are expressed as mean  $\pm$  s.d. of triplicate determinations. \* $p < 0.005$ , Student *t* test.

**Supplemental Figure S8. Gene expression in cholangiocytes treated with *siCcn1* or CCN1 protein.** (A) LMCCs were treated with *siCcn1* or non-targeting siRNA as control for 2 days. Expression of indicated genes was measured by qRT-PCR of mRNA. (B) Cells were treated overnight with purified recombinant CCN1 or BSA as control (4  $\mu$ g/ml each), and expression of

indicated genes was analyzed by qRT-PCR. Data are expressed as mean  $\pm$  s.d. of triplicate determinations. \* $p < 0.004$ , Student  $t$  test.

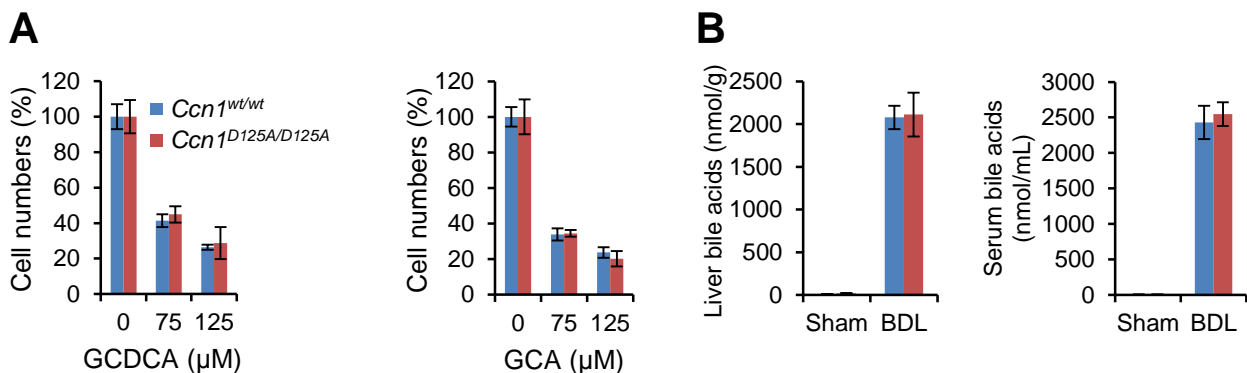

**Supplemental Figure S1. Bile acid accumulation and hepatocyte sensitivity to bile acid in  $Ccn1^{wt/wt}$  and  $Ccn1^{D125A/D125A}$  mice.** (A) Primary hepatocytes were isolated from  $Ccn1^{wt/wt}$  and  $Ccn1^{D125A/D125A}$  mice and incubated with indicated concentration of GCDCA or GCA overnight, and cell numbers were counted. Average values from triplicate determination are expressed as mean  $\pm$  s.d. (B) Liver bile acids and serum bile acids from  $Ccn1^{wt/wt}$  and  $Ccn1^{D125A/D125A}$  mice 7 days after BDL or sham operation were measured. Data expressed are mean  $\pm$  s.d. n=6 per group. Bile acid production and hepatocyte sensitivity to bile acid in  $Ccn1^{wt/wt}$  and  $Ccn1^{D125A/D125A}$  mice were similar.

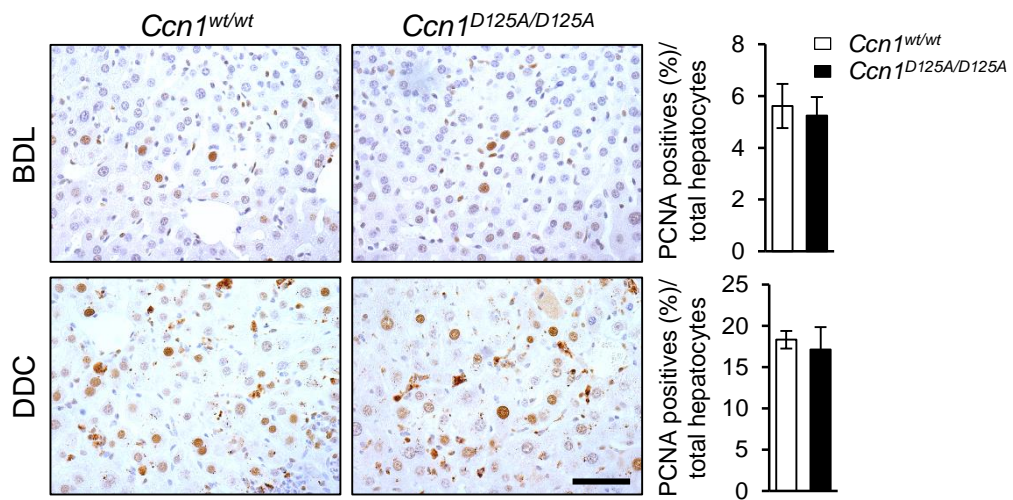

**Supplemental Figure S2. Hepatocytes proliferation from *Ccn1*<sup>wt/wt</sup> and *Ccn1*<sup>D125A/D125A</sup> mice after BDL or DDC-diet were not different.** Liver sections from *Ccn1*<sup>wt/wt</sup> and *Ccn1*<sup>D125A/D125A</sup> 7 days after BDL (upper panel) or DDC-diet for 6 weeks (lower panel) were immunostained for PCNA, and percentage of PCNA-positive hepatocytes were quantified and expressed as mean  $\pm$  s.d. (n=6 per group). Bar=50  $\mu$ m.

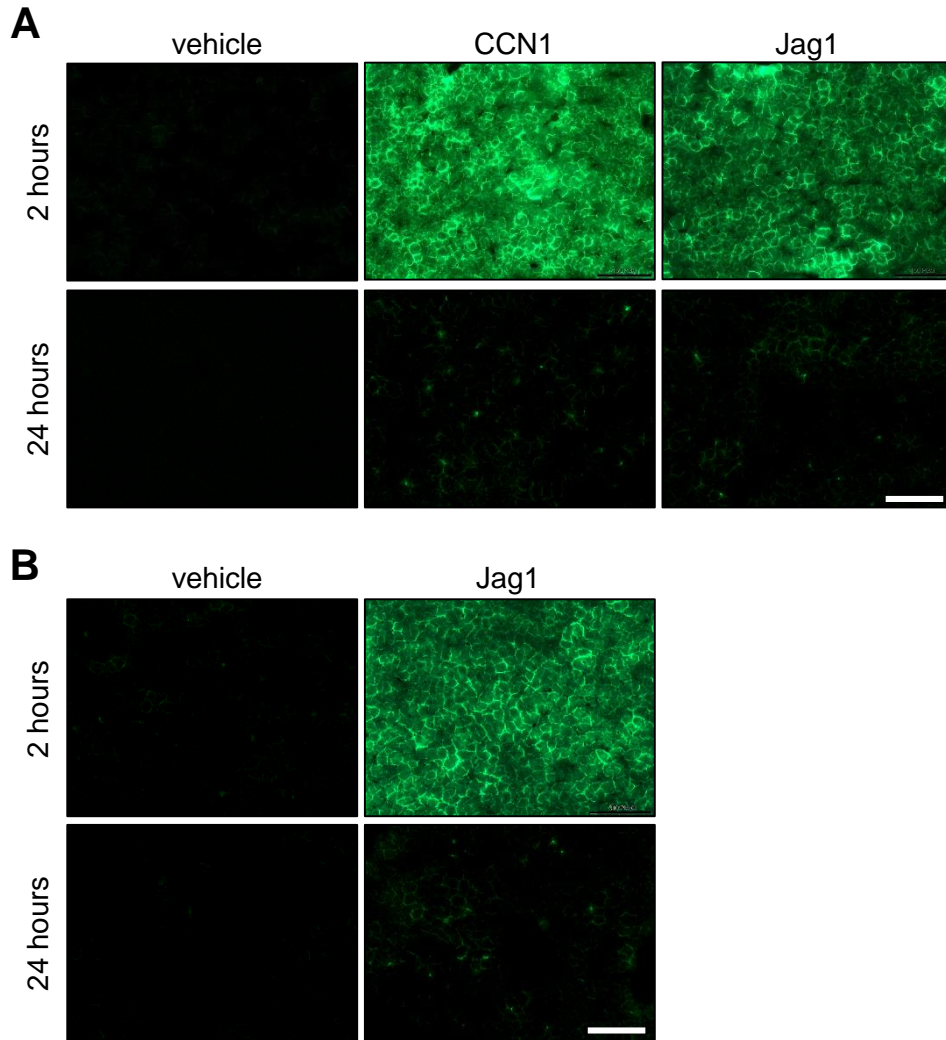

**Supplemental Figure S3. Localization of FITC-labeled CCN1 or Jag1 in the liver.** (A) FITC-labeled CCN1 protein or soluble Jag1 (1 mg/kg each) were delivered into WT mice via retro-orbital injection (A) or intraperitoneal injection (B), and liver tissues were collected after 2 or 24 hours. Fluorescent signals (494 nm excitation/518 nm emission) were obtained in liver cryosections (7  $\mu$ m). Bar=100  $\mu$ m.

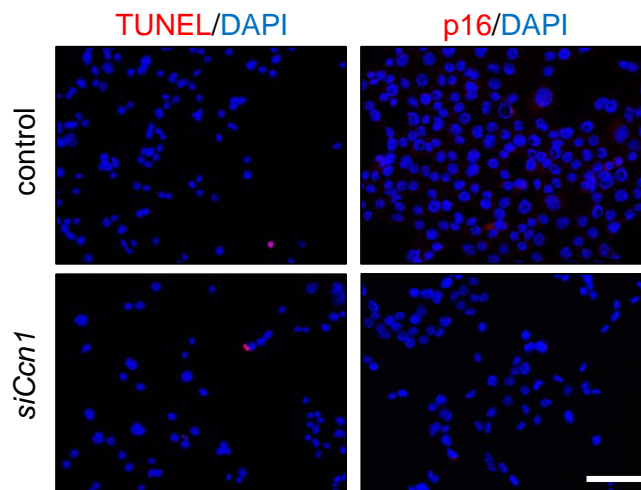

**Supplemental Figure S4. Knockdown of *Ccn1* did not induce cholangiocyte apoptosis or senescence.** LMCCs were incubated with *siCcn1* or non-targeting siRNA control for 2 days, and analyzed for TUNEL staining (left panel) and stained with antibody recognizing p16 (right panel). Bar = 50  $\mu$ m.

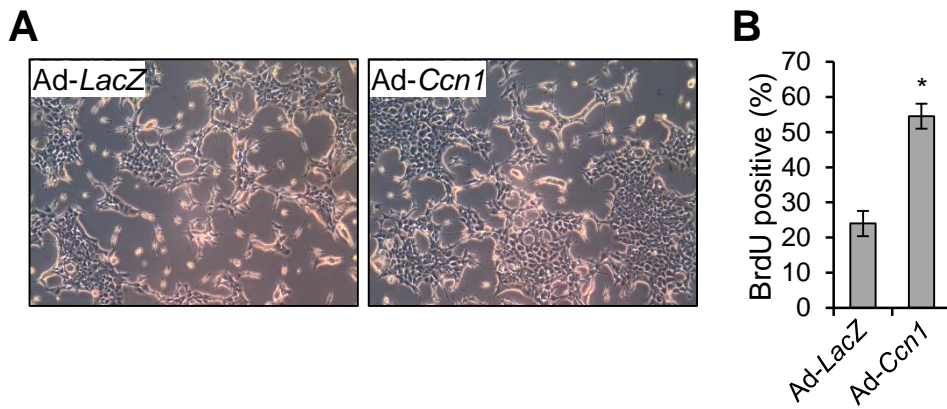

**Supplemental Figure S5. Adenoviral overexpression of *Ccn1* enhanced cholangiocyte cell proliferation.** LMCCs were transduced with adenovirus overexpressing *Ccn1* or *LacZ* as control. (A) Pictures showing cells 2 days after viral transduction. (B) Cells were incubated with BrdU for 25 min. and percentage of BrdU positive cells were counted. Data are expressed as mean  $\pm$  s.d. of triplicate determinations. \* $p < 0.001$ , Student *t* test.

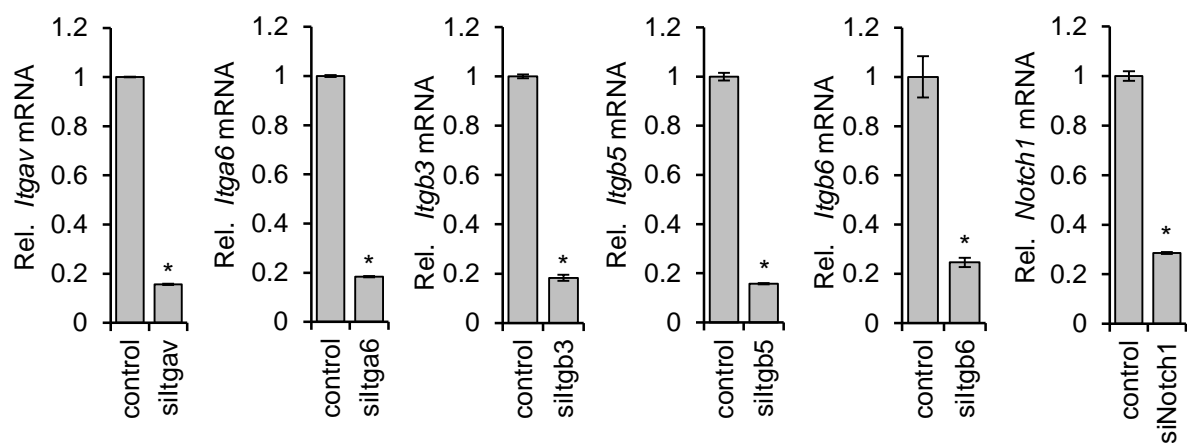

**Supplemental Figure S6. Efficiency of siRNA knockdown.** LMCCs were treated siRNA targeting indicated integrin subunits and non-targeting siRNA as control for 2 days. Total RNA was isolated and mRNA expression of genes indicated was evaluated by qRT-PCR. Data are expressed as mean  $\pm$  s.d. of triplicate determinations. \* $p < 0.0001$ , Student  $t$  test.

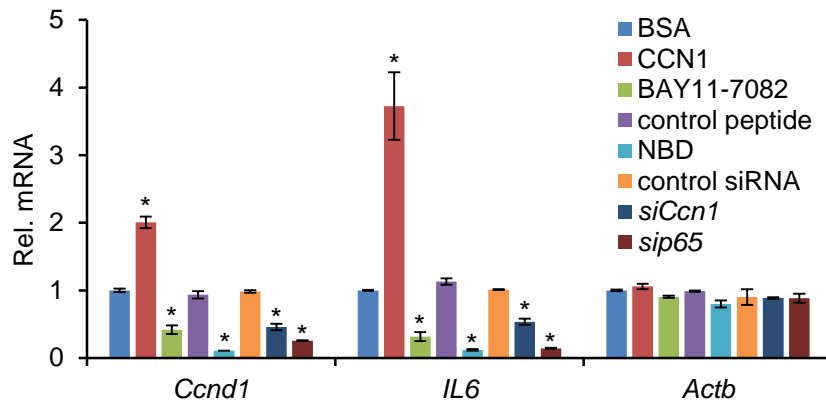

**Supplemental Figure S7. Expression of proliferation-related NFκB target genes.** LMCCs were treated with *siCcn1*, *siJag1* or non-targeting siRNA as control for 2 day, or treated overnight with purified recombinant CCN1 or BSA as control (4 μg/ml each), BAY11-7082 (5 μM), control peptide (25 μM) or NBD (25 μM). Expression of cyclin D1, IL-6, and β-actin was measured by qRT-PCR of mRNA. Data are expressed as mean ± s.d. of triplicate determinations. \* $p < 0.005$ , Student *t* test.

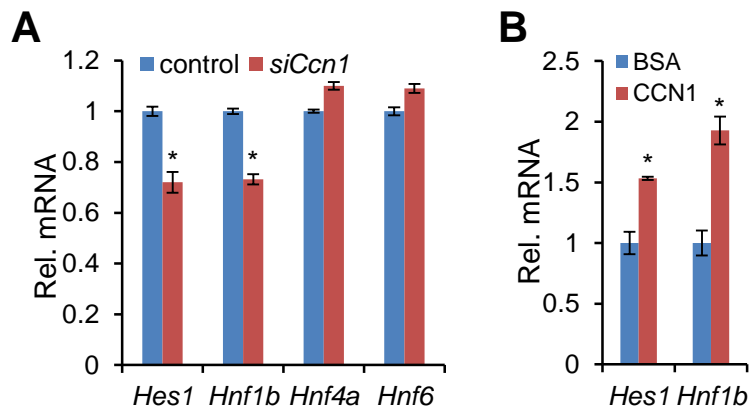

**Supplemental Figure S8. Gene expression in cholangiocytes treated with *siCcn1* or CCN1 protein.** (A) LMCCs were treated with *siCcn1* or non-targeting siRNA as control for 2 days. Expression of indicated genes was measured by qRT-PCR of mRNA. (B) Cells were treated overnight with purified recombinant CCN1 or BSA as control (4  $\mu$ g/ml each), and expression of indicated genes was analyzed by qRT-PCR. Data are expressed as mean  $\pm$  s.d. of triplicate determinations. \* $p < 0.004$ , Student *t* test.

**Supplementary Table 1. Primer sequences used in this study.**

| <b>Gene</b>  | <b>Orientation</b> | <b>Sequence (5' to 3')</b> |
|--------------|--------------------|----------------------------|
| <i>Actb</i>  | sense              | ctaaggccaaccgtgaaag        |
|              | antisense          | accagaggcatacagggaaca      |
| <i>Ccn1</i>  | sense              | aaaggcagctcactgaag         |
|              | antisense          | gccggtatttcttgacac         |
| <i>Ccnd1</i> | sense              | taggccctcagcctcact         |
|              | antisense          | ccacccctgggataaagcac       |
| <i>Cftr</i>  | sense              | gctagtgtgatttggtgcg        |
|              | antisense          | gtcagccactcccacgtaaa       |
| <i>Ck19</i>  | sense              | acttgcgcgacaagattc         |
|              | antisense          | aacttggttctgaagtcactctgc   |
| <i>CypE</i>  | sense              | ttcacaaccacaatggcacaggg    |
|              | antisense          | tgccgtccagccaatctgtcttat   |
| <i>Dll1</i>  | sense              | tacacatgttctgccgacc        |
|              | antisense          | aggtgcaagagaagctgtcc       |
| <i>Dll3</i>  | sense              | gcaccttctccctcgtcatt       |
|              | antisense          | gaagtgcaactcccatgtgc       |
| <i>Dll4</i>  | sense              | ggtcgcctgtgcaatgaatg       |
|              | antisense          | ttcttgacggagagtggtg        |
| <i>Hes1</i>  | sense              | agaggctccaagggttttg        |
|              | antisense          | tcccactgttgctggtgtaga      |
| <i>Hnf1a</i> | sense              | ccacgccttatacagccaca       |
|              | antisense          | atcaacatggtctgcgggag       |
| <i>Hnf1a</i> | sense              | ccacgccttatacagccaca       |
|              | antisense          | atcaacatggtctgcgggag       |
| <i>Hnf1b</i> | sense              | catctgcaatggtggcacag       |
|              | antisense          | ggcttgcaaggcacctgttt       |
| <i>Hnf4a</i> | sense              | atgacacgtccccatctgaag      |
|              | antisense          | ctcagggtccgtagtggttg       |
| <i>Hnf6</i>  | sense              | caaataccatctcccagcag       |
|              | antisense          | cagactcctcctcctggcatt      |
| <i>Il6</i>   | sense              | accactcccaacagacc          |
|              | antisense          | tccagaagaccagaggaa         |
| <i>Itgav</i> | sense              | cgctctccaggatgtttctcc      |
|              | antisense          | tccaaaccactggtgggact       |
| <i>Itga6</i> | sense              | tgccacctatcacaaggctg       |
|              | antisense          | cggggaatgctgtcatcgta       |
| <i>Itgb3</i> | sense              | gctcattggccttgctactc       |
|              | antisense          | cccggtaggtgatattggtg       |
| <i>Itgb5</i> | sense              | aatgtggaagtgcccccaat       |
|              | antisense          | gtacaggggggttgaggctt       |

| Gene          | Orientation | Sequence (5' to 3')     |
|---------------|-------------|-------------------------|
| <i>Itgb6</i>  | sense       | tctgaggatggagtgctgtg    |
|               | antisense   | ccatctgcagacaggtagca    |
| <i>Jag1</i>   | sense       | cagtgcctctgtgagaccaa    |
|               | antisense   | aggggtcagagagacaagca    |
| <i>Jag2</i>   | sense       | gctacttgggcaagaactgc    |
|               | antisense   | gttccatcctgacggacagt    |
| <i>Notch1</i> | sense       | cccactgtgaactgccctat    |
|               | antisense   | ccccattcttcagttgttt     |
| <i>Notch2</i> | sense       | aaaatctgccctccactgg     |
|               | antisense   | ccgcttcataactccctctc    |
| <i>Notch3</i> | sense       | tgaacaacgtggaggctacc    |
|               | antisense   | gcagcctgtccaagtgatct    |
| <i>Notch4</i> | sense       | ctctgtccccaggttcac      |
|               | antisense   | cccgggcttcacattcatct    |
| <i>Shh</i>    | sense       | acccaactccgatgtgtccgta  |
|               | antisense   | tatataaccttgctgccgctgct |
| <i>Wnt3a</i>  | sense       | tcactgcgaaagctactcca    |
|               | antisense   | caccaccgtcagcaacag      |
| <i>Wnt7b</i>  | sense       | tcccctgtctgtcatgtctctt  |
|               | antisense   | ctgtttcaagcagaaggaggag  |

**Supplementary Table 2. List of RNAi sequences**

| Protein          | Target sequence (5' to 3')   |
|------------------|------------------------------|
| Ccn1             | taactcattgtttctcgttaactccac  |
| Integrin alpha-v | gtcatatttagatatgatttctgccac  |
| Integrin alpha-6 | aaagggtaacatcaccttctattgcac  |
| Integrin beta-3  | attccttaactgcttgttctactactg  |
| Integrin beta-5  | ttccactagtgcataatgttgagccctg |
| Integrin beta-6  | ataccataactaatacaatccttccat  |
| Jagged1          | agctatattacagggtgttccttccca  |
| Notch1           | atcttgtaaggaatattgaggctgccca |
| p65              | gcgagttatagcttcagggtactccat  |
